# Supplementary material for: PHOSIDA (phosphorylation site database): management, structural and evolutionary investigation, and prediction of phosphosites
Source: PubMed Central journal article supplement (PMC2258193; doi:10.1186/gb-2007-8-11-r250), 2007-11-26

**a**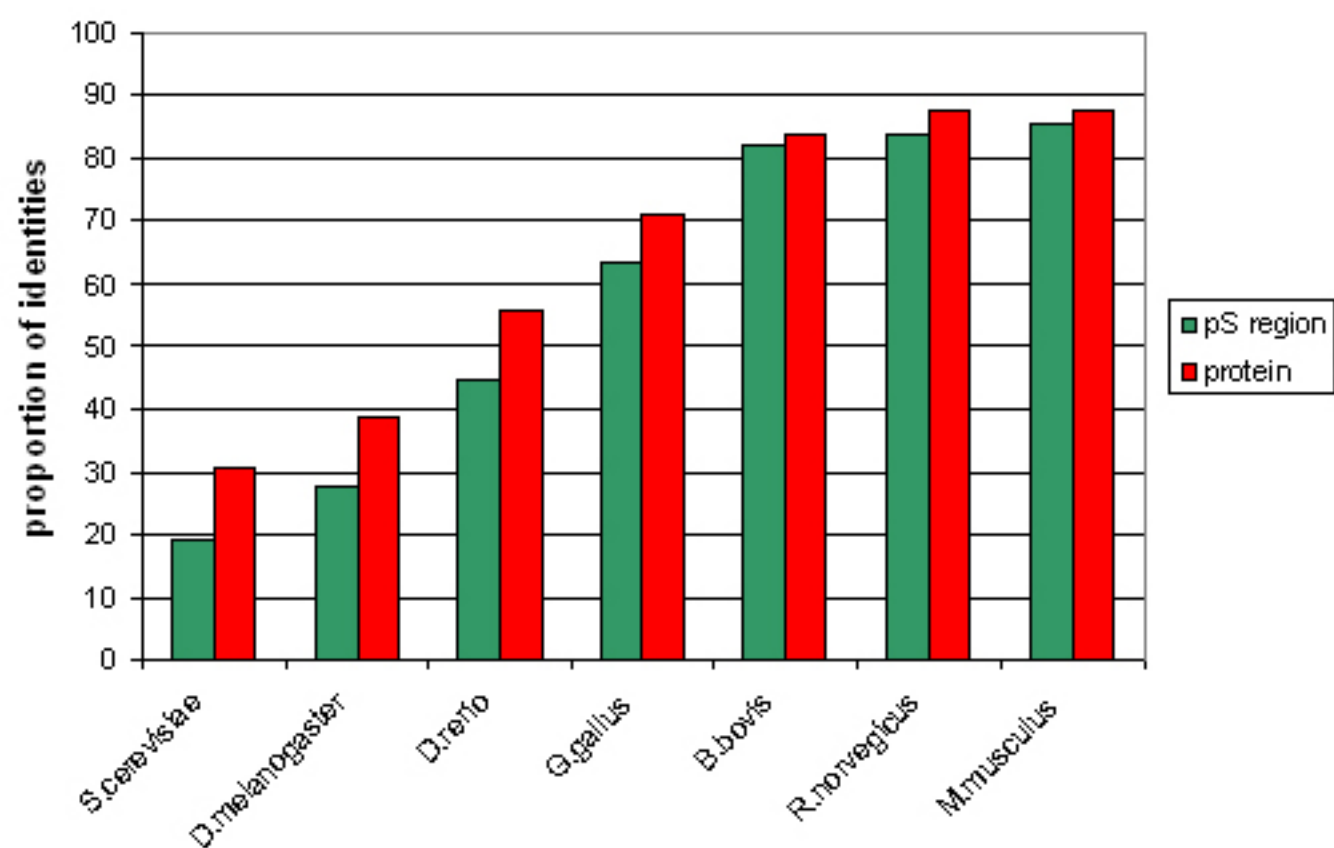**b**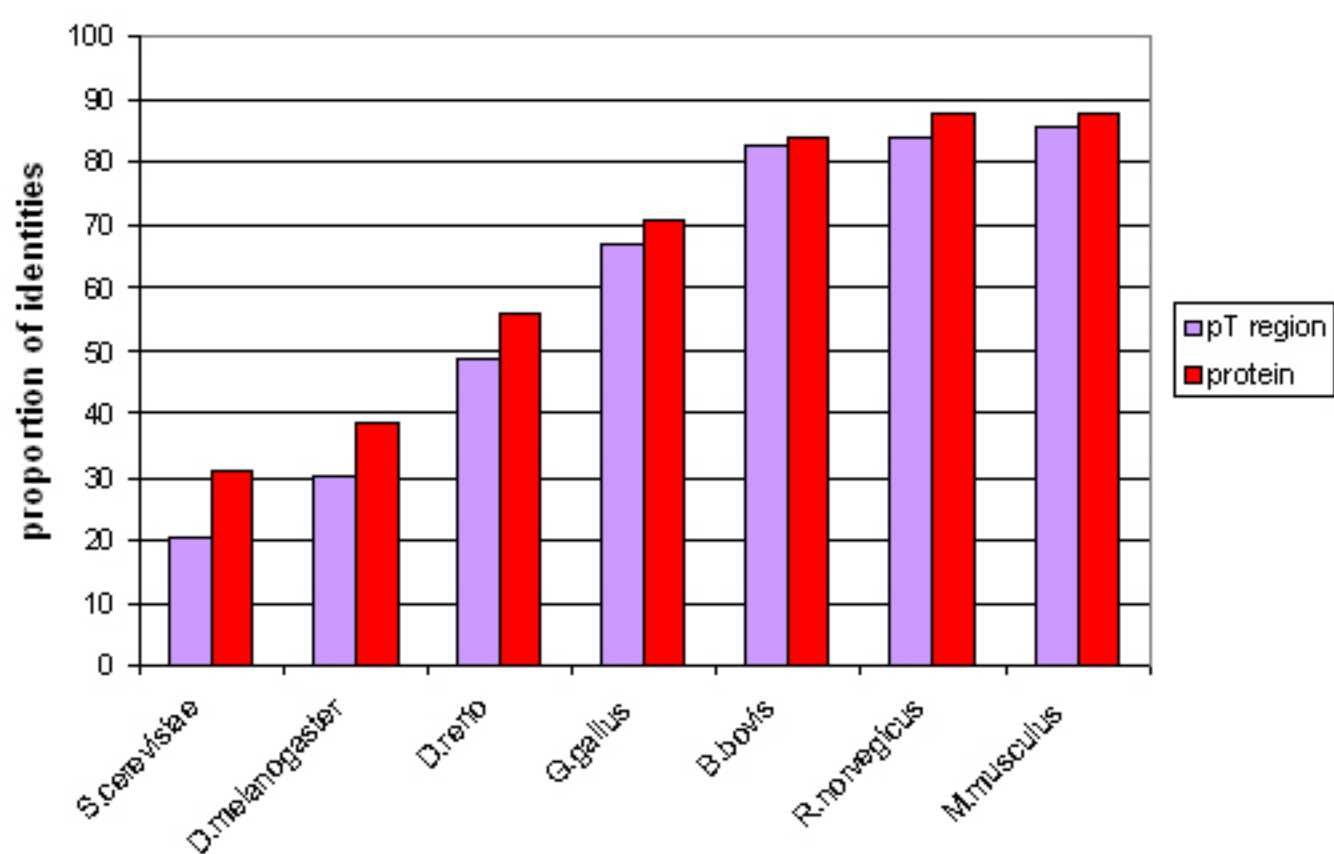**c**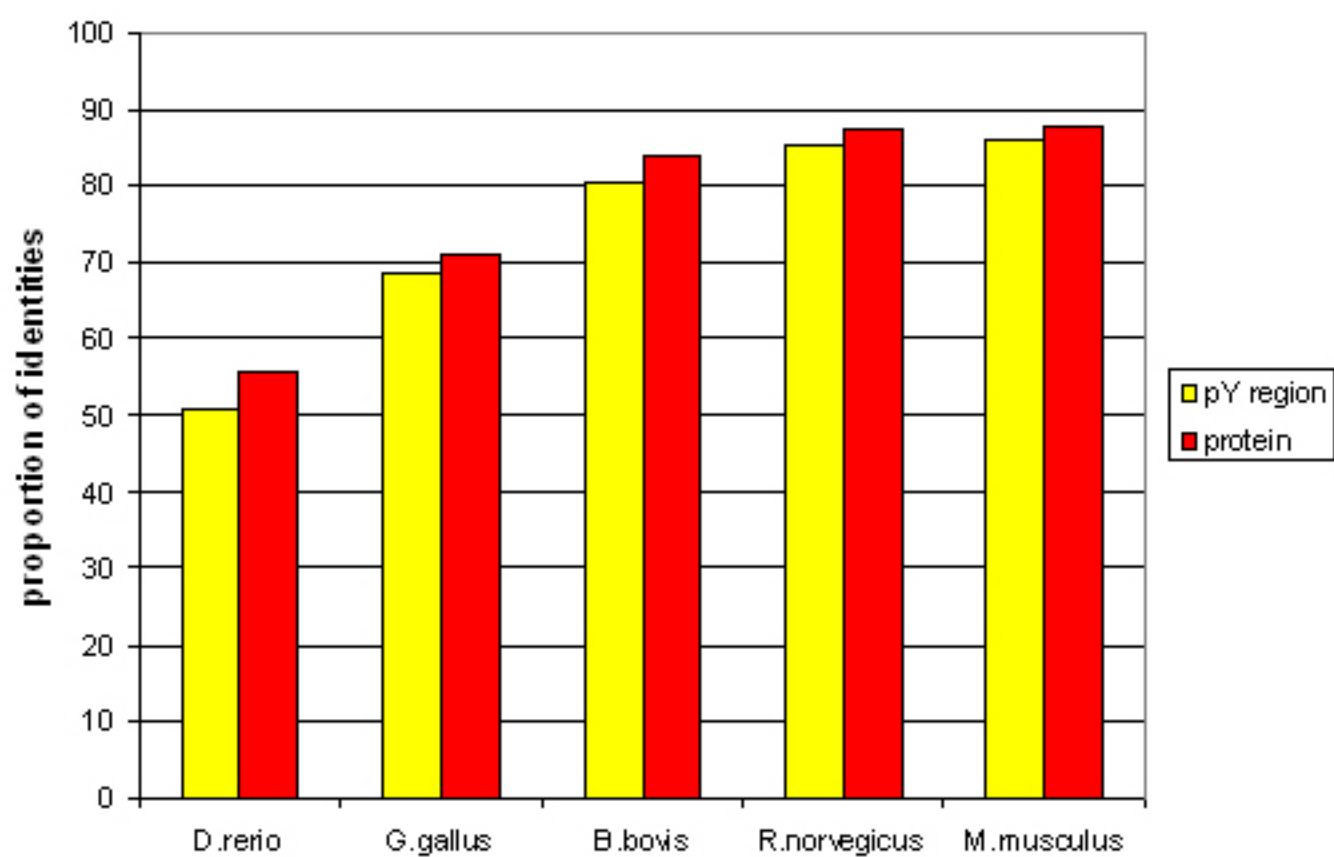

Supplement: gb-2007-8-11-r250-S4.pdf [file gb-2007-8-11-r250-S4.pdf]
